# Supplementary material
Source: Springer Nature journal article supplement (https://www.springerprofessional.de/resource/supplementary/13688_2018_132_MOESM1_ESM.pdf/15435518)
Supplement: MOESM1 [file 15435518]

### Additional file 1

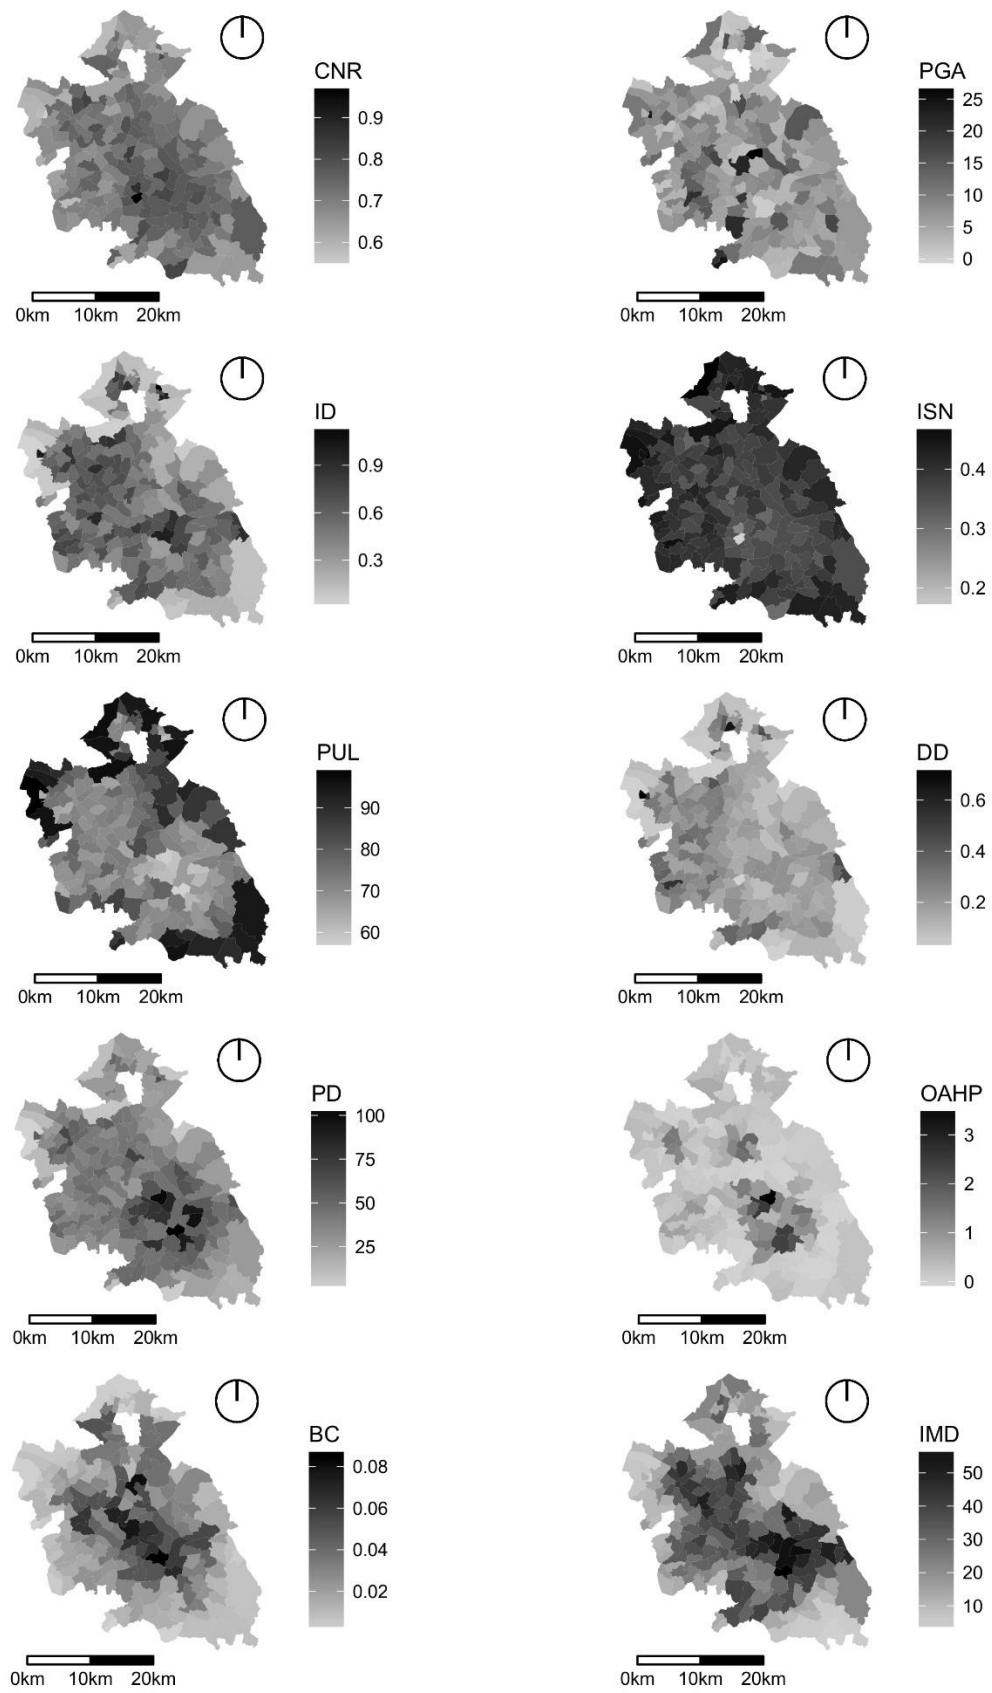

Figure 1. Maps of the metrics of urban form and IMD, for Birmingham.

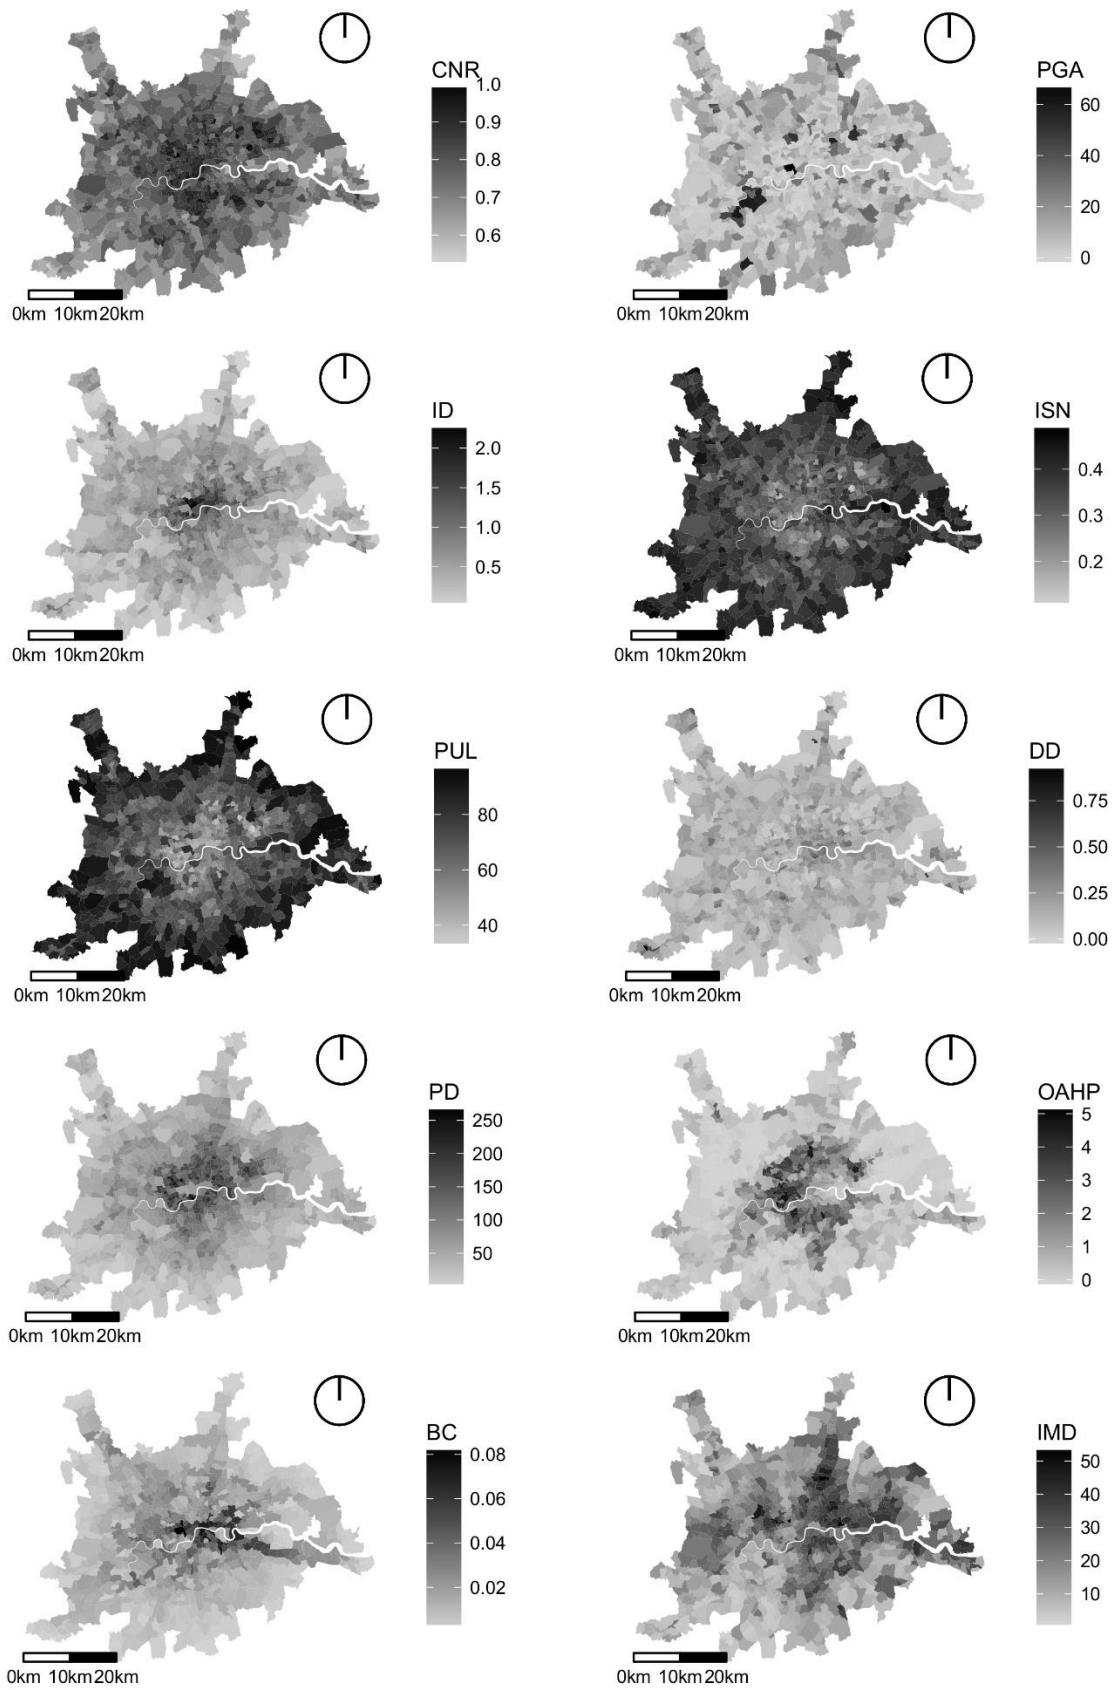

Figure 2. Maps of the metrics of urban form and IMD, for London.

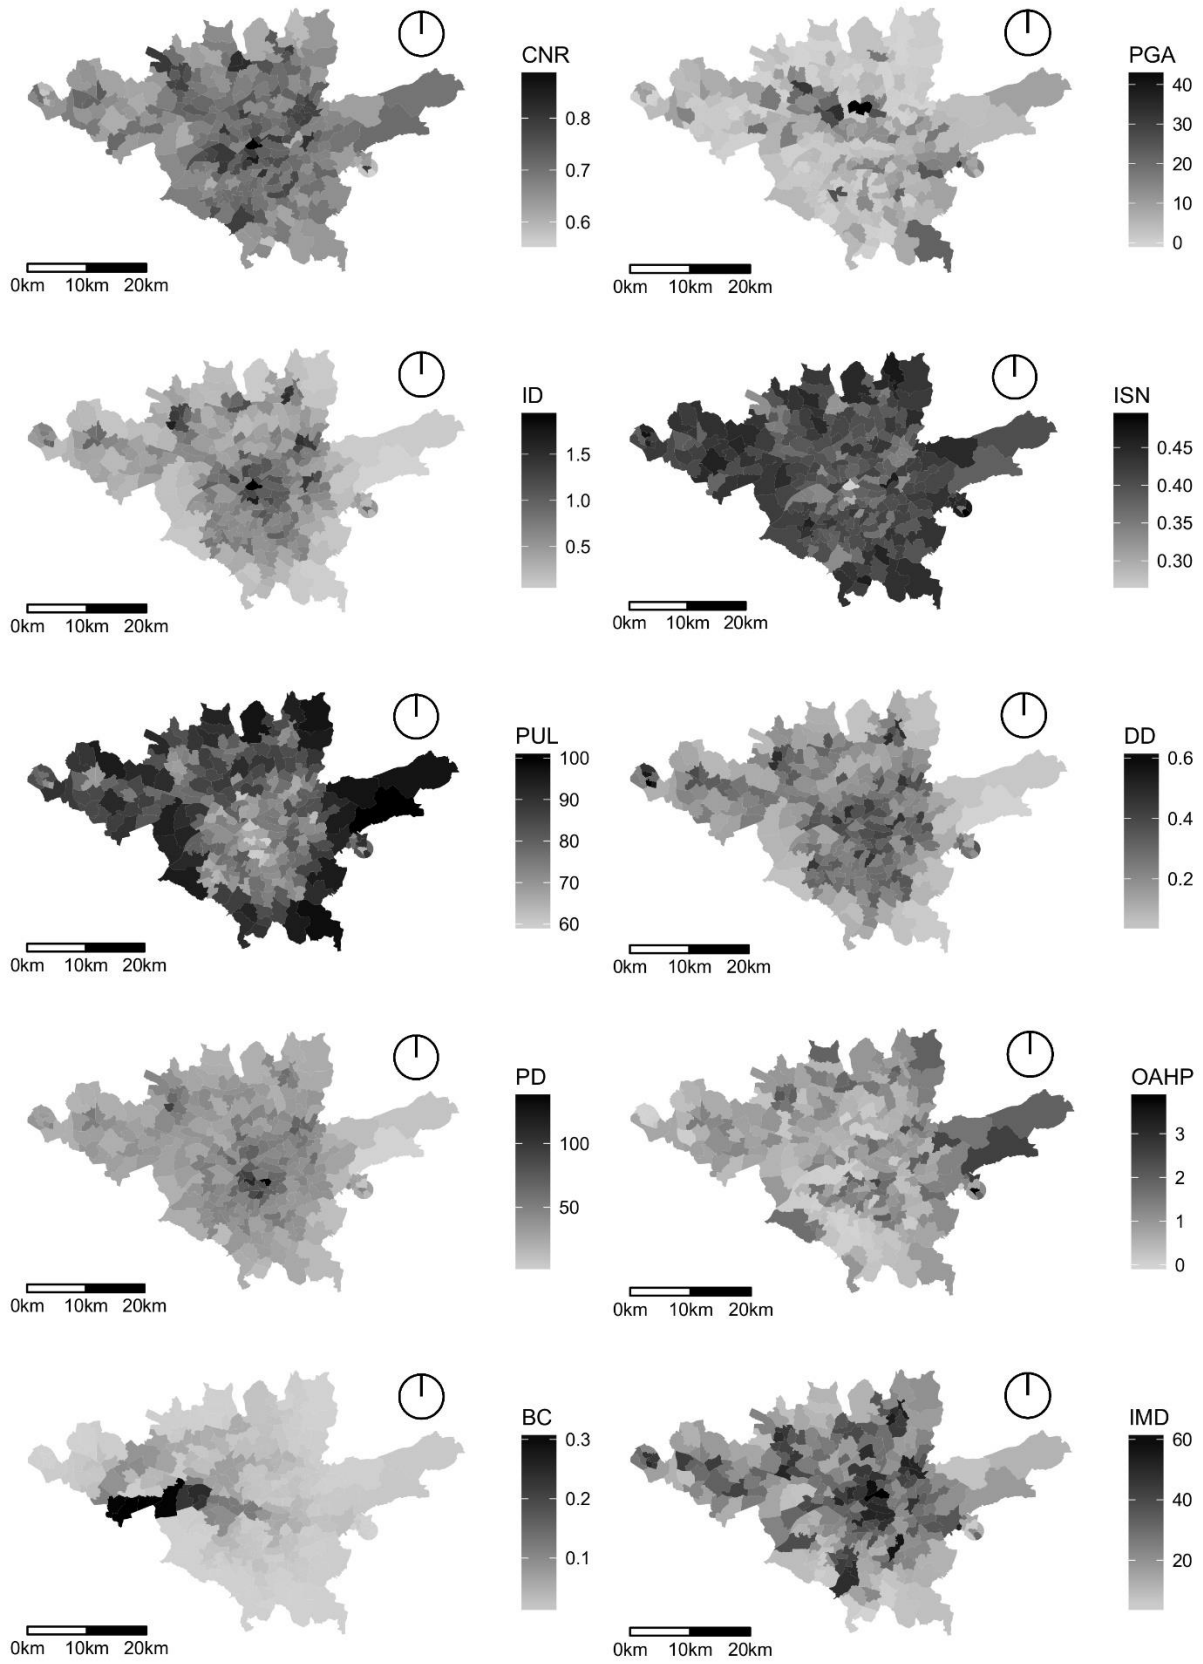

Figure 3. Maps of the metrics of urban form and IMD, for Manchester.

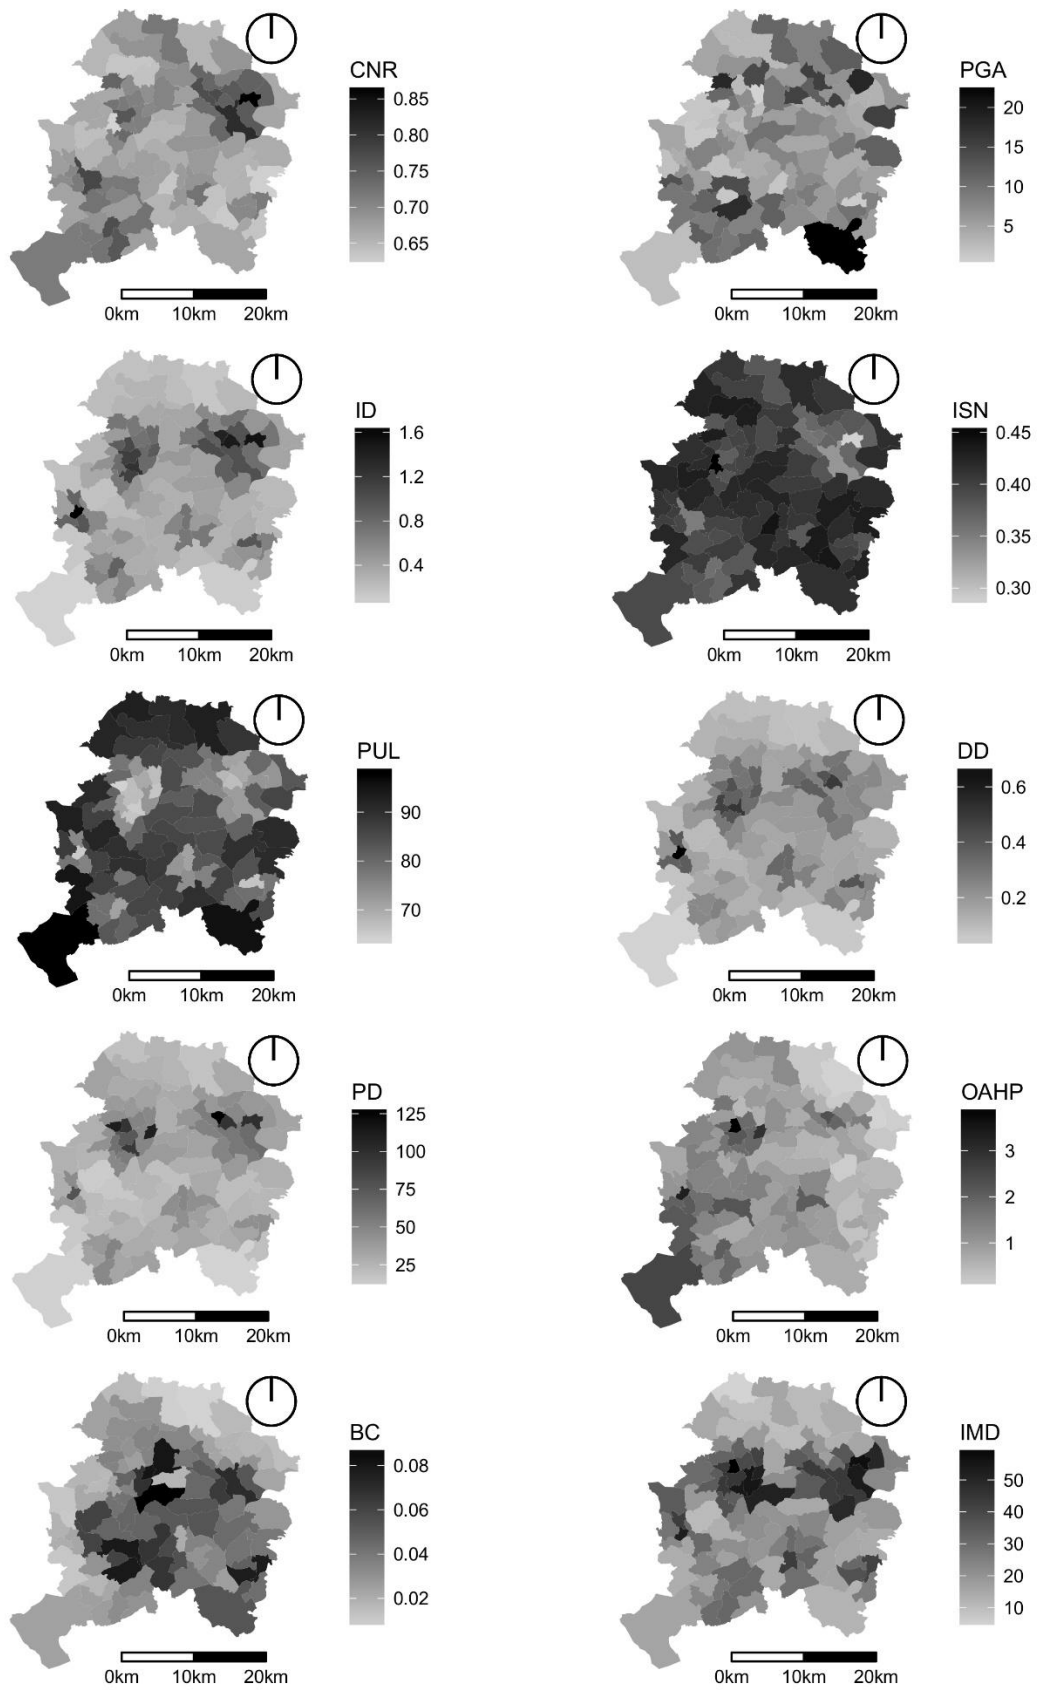

Figure 4. Maps of the metrics of urban form and IMD, for Leeds.



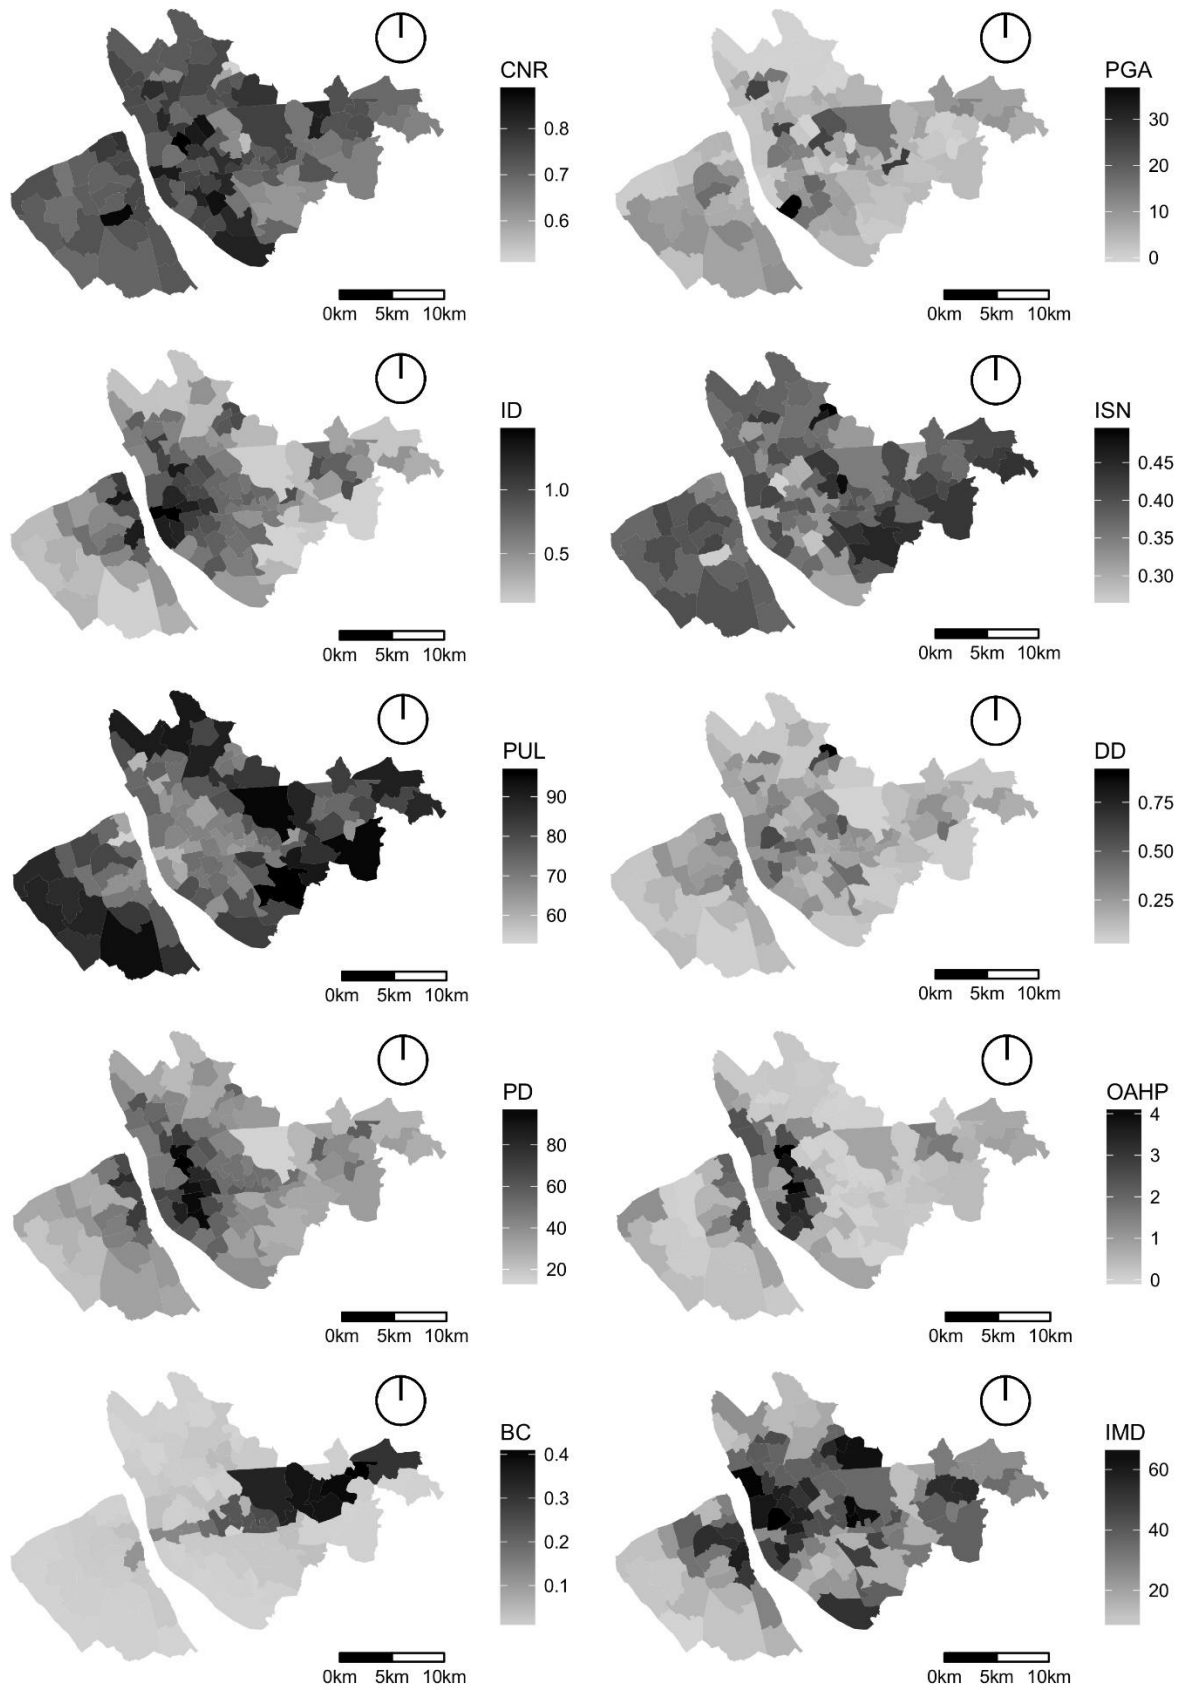

Figure 5. Maps of the metrics of urban form and IMD, for Liverpool.

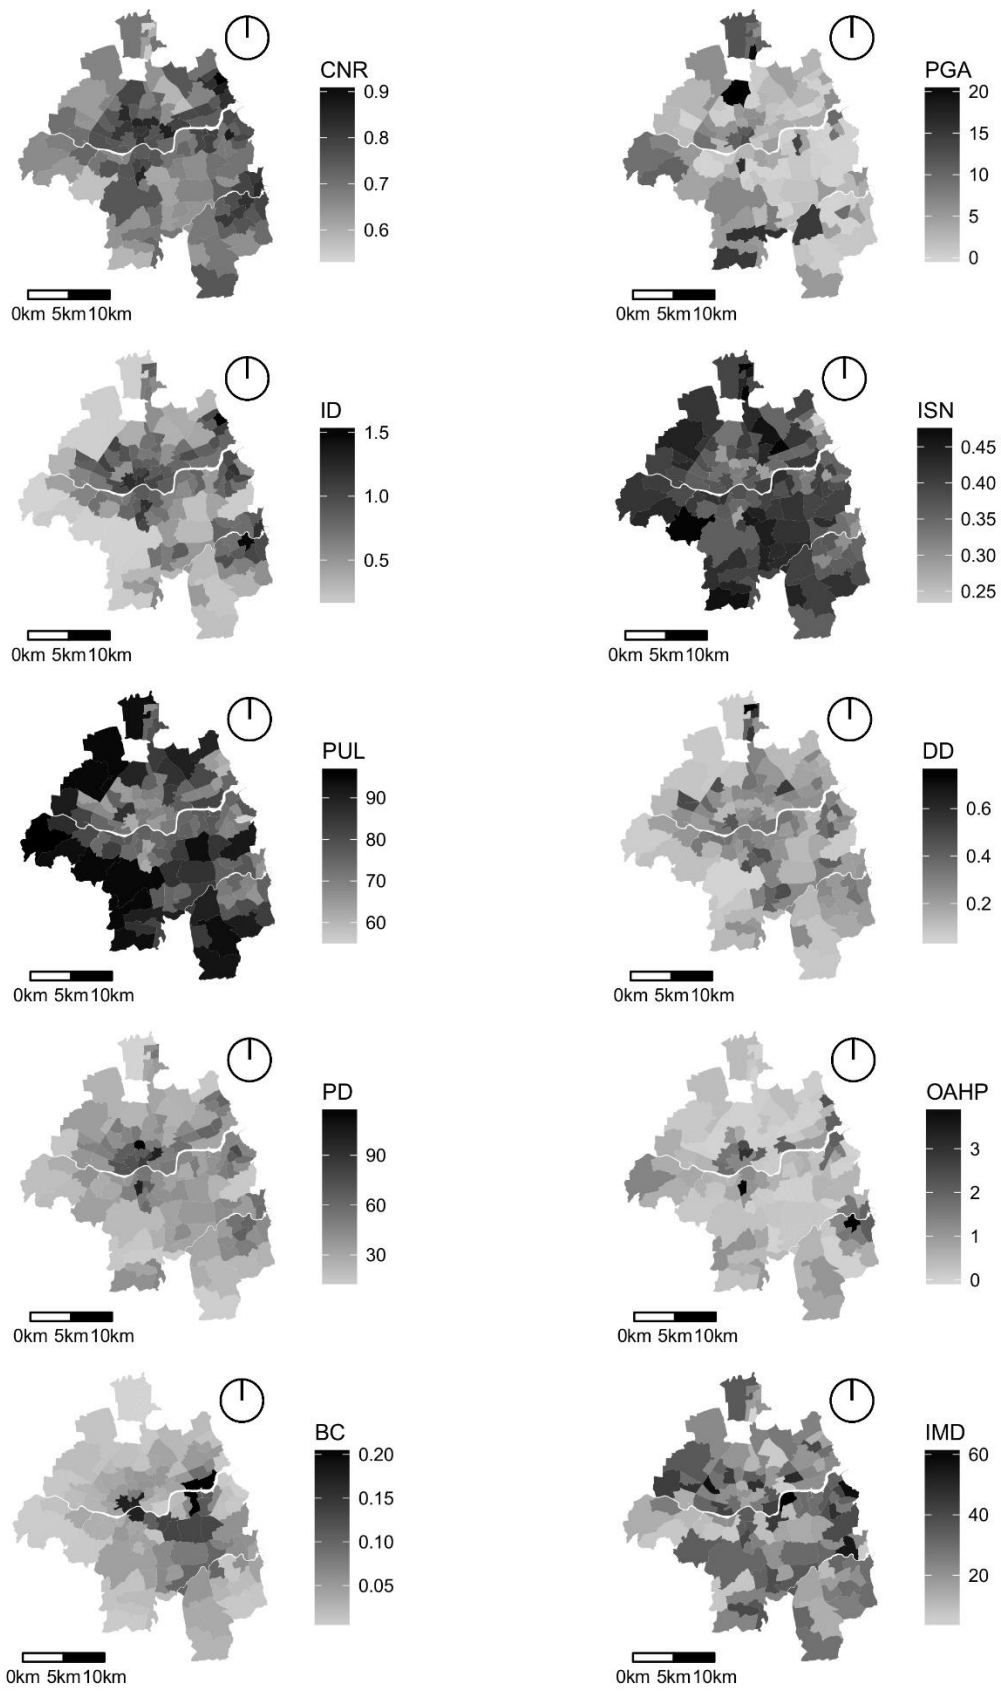

Figure 6. Maps of the metrics of urban form and IMD, for Newcastle.
